# Supplementary material for: HnRNP-L regulated circCSPP1/miR-520h/EGR1 axis modulates autophagy and promotes progression in prostate cancer
Source: Research Square preprint supplement (doi:10.21203/rs.3.rs-147854/v1), 2021-01-19
Supplement: Supplementary file 1 [file 42ea0cc861de28a66ac2780d.docx]

Supplementary Table 3 Clinical characteristics of the benign prostate hyperplasia.

| Parameter |  | |  | | |
| --- | --- | --- | --- | --- | --- |
| Age at diagnosis (mean ± SD) |  | | | 70.7 ± 3.92 | |
| Pathological diagnosis , n(%) | Benign | 10 | | | 100% |
|  | Cancer | 0 | | | 0% |
| PSA at diagnosis (ng/ml), n(%) | 0-3.9 | 10 | | | 100% |
|  | 4-9.9 | 0 | | | 0% |
|  | ≥10 | 0 | | | 0% |
